# Supplementary material for: Cellular cytotoxicity is a form of immunogenic cell death
Source: PubMed Central journal article supplement — J Immunother Cancer. 2020 Mar 26;8(1):e000325. doi: 10.1136/jitc-2019-000325 (PMC7206966; doi:10.1136/jitc-2019-000325), 2020-03-26
Supplement: jitc-2019-000325supp001.pdf [file jitc-2019-000325supp001.pdf]

## Supplementary Figures

## Target cells

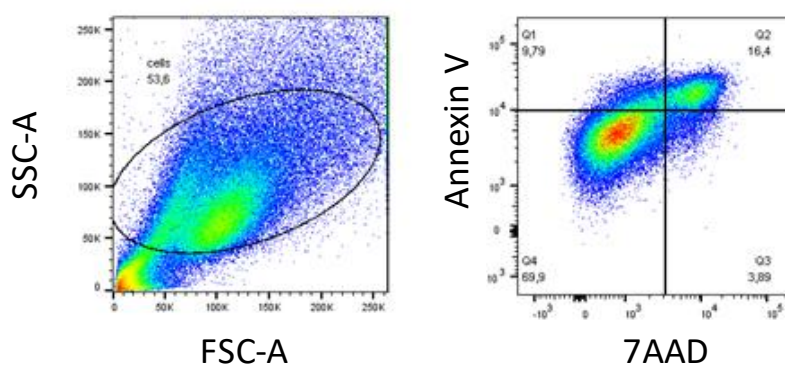

## Target cells + CD8 Pmels

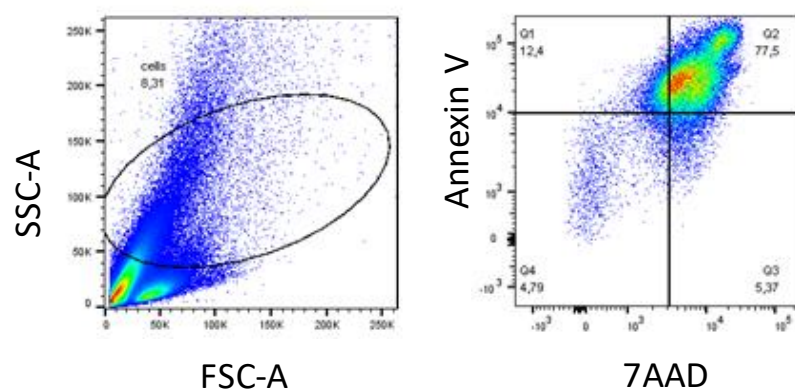

**Supplementary Figure 1. Assessment of CTL-induced tumor cell death by flow cytometry.** MC38hEGFROVA cells were incubated 48 hours with IFN $\gamma$  (15UI/ml) and gp100 peptide (100ng/ml) and Pmel-1-derived splenocytes were activated for 48 hours with gp100 peptide (100ng/ml) and 48 hours with IL-2 (30 UI/ml). At day -3, tumor cells and Pmel-1 cells were co-cultured. At day 0, the result of the co-culture was analyzed by flow cytometry after staining with 7-AAD, and Annexin V. Dot plots represent the gating strategy and 7-AAD and Annexin V double staining in a representative co-culture

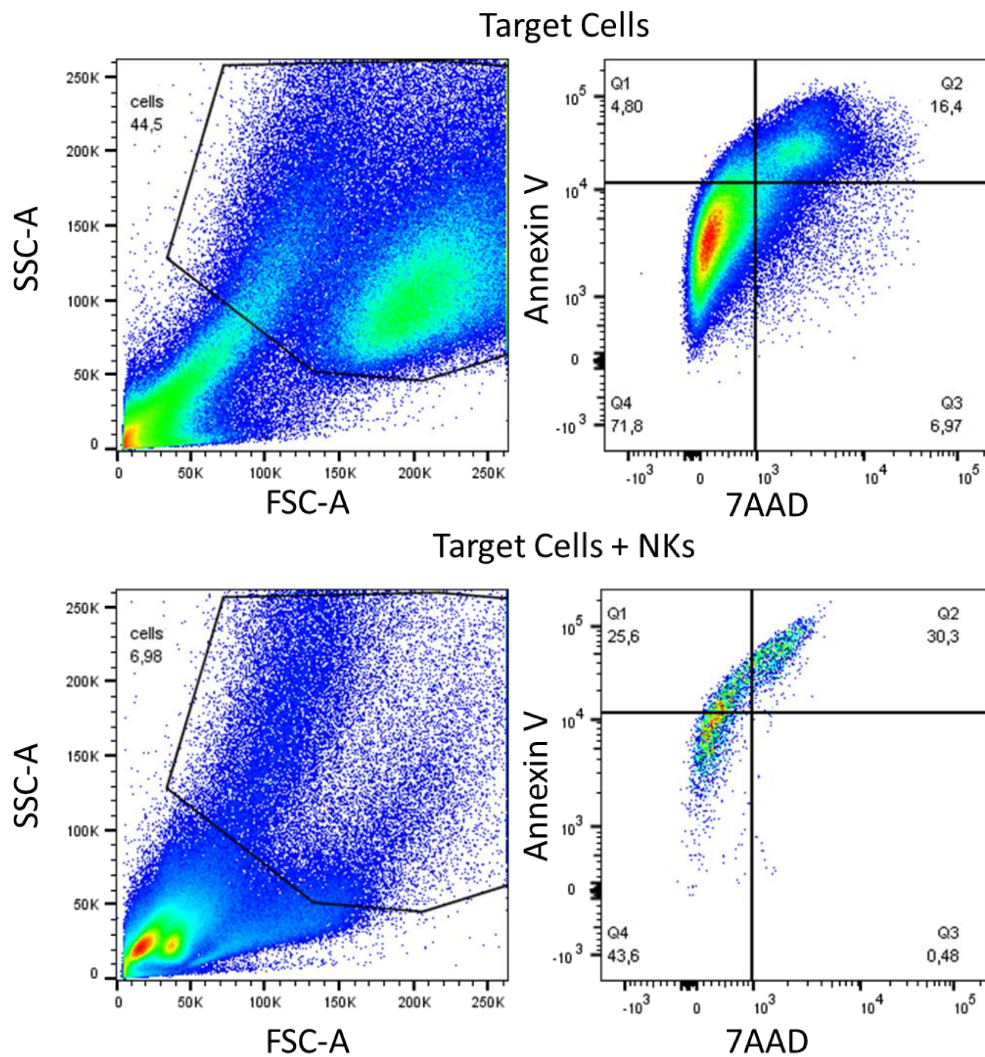

**Supplementary Figure 2. Assessment of NK-induced tumor cell death by flow cytometry.** RAG1 mice were hydrodynamically injected with a plasmid coding for IL-15. After three days, spleens were harvested and NK isolated by immunomagnetic negative selection. MC38hEGFROVA cells were incubated with such IL-15 *in vivo* activated NK cells for 72 hours. The result of the co-culture was analyzed by flow cytometry after staining with 7-AAD, and Annexin V. Dot plots represent the gating strategy and 7-AAD and Annexin V double staining in a representative co-culture.

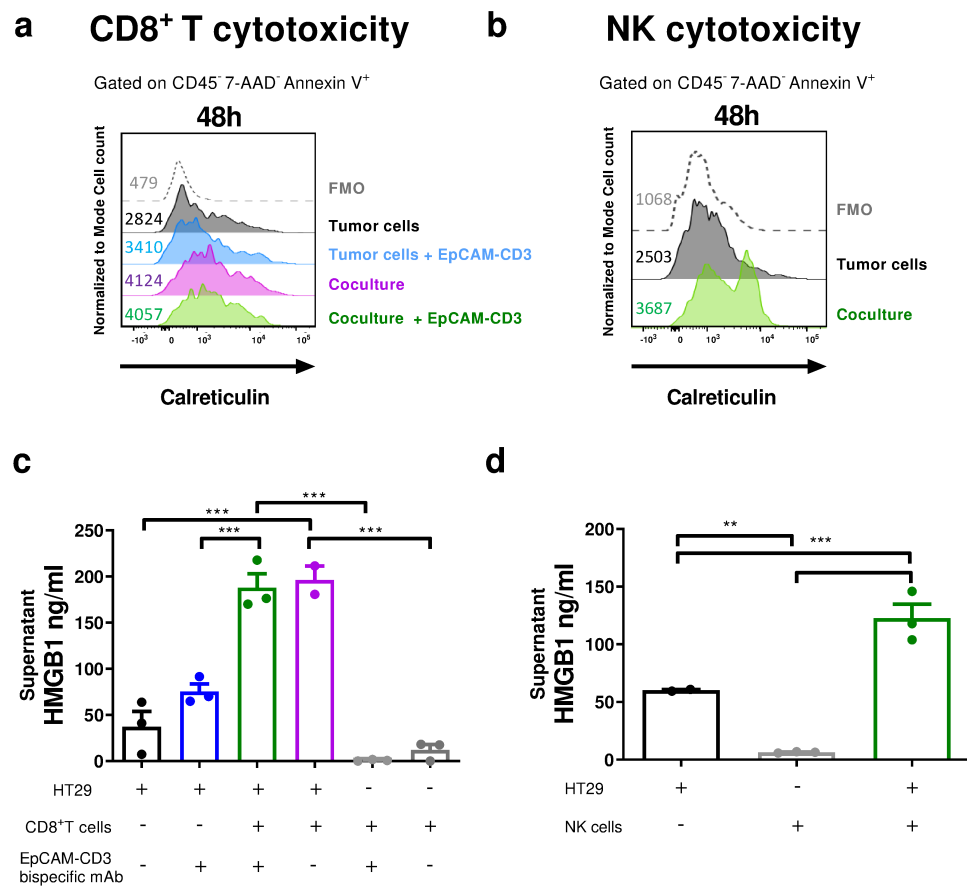

**Supplementary Figure 3. Cellular cytotoxicity induces the release of danger-associated molecular patterns by dying human cancer cells in culture.** A) HT29 cells were co-cultured with human T cells at a ratio 1:1 with or without EpCAM-CD3 $\epsilon$  bispecific antibody (1 $\mu$ g/ml) for 48 hours and calreticulin expression on dying tumor cells (CD45<sup>+</sup>7-AAD<sup>-</sup>Annexin V<sup>+</sup>) was analyzed by flow cytometry. Numbers in histograms indicate FMI. B) As in A but HT29 were killed by human CD3<sup>+</sup>CD56<sup>+</sup> NK cells pre-activated 48 hours before with IL-2 (100 UI/ml) and IL-15 (10ng/ml). Supernatants from the co-cultures with human T cells (C) or human NK cells (D) were analyzed for HMGB1 concentration by ELISA. n=2 for HT29+T, n=3 for other groups (C). n=2 for HT29, n=3 for other groups (D). One-way ANOVA test with Tukey's

multiple comparisons tests, \*\*\* $p < 0.001$ . Results are representative of two experiments performed.

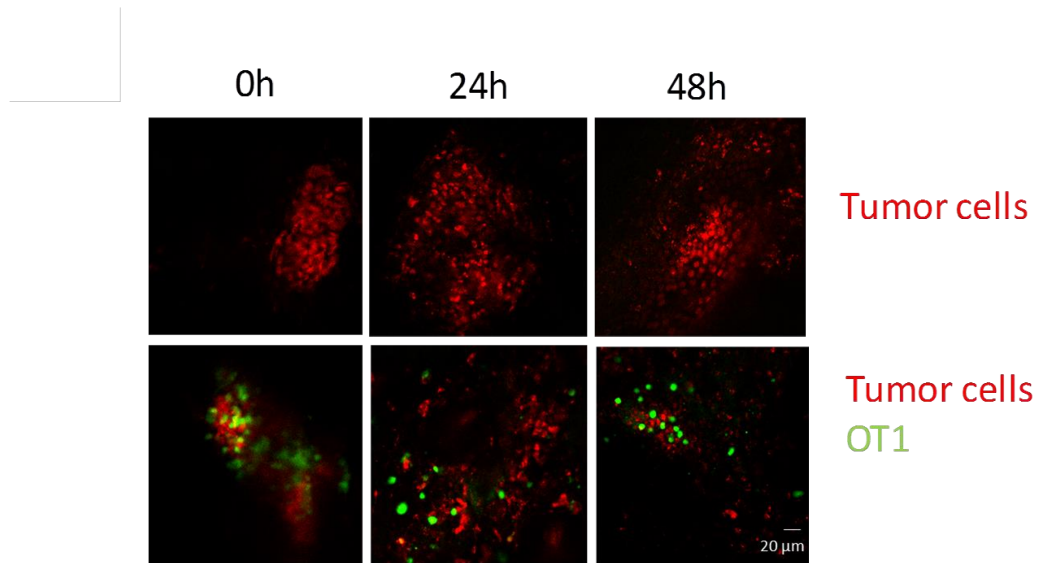

**Supplementary Figure 4. Visualization of OT-I-mediated killing of tumor cells *in vivo*.** *In vitro* activated OT-I-EGFP-derived splenocytes were co-injected with DRAQ 5 pre-labeled MC38hEGFROVA cells at a ratio 20:1 and injected subcutaneously into the ear dermis of C57BL/6 mice. Tumor and OT-I cells were visualized at day 0, 1, and 2 in mice by intravital imaging using an inverted confocal microscope.

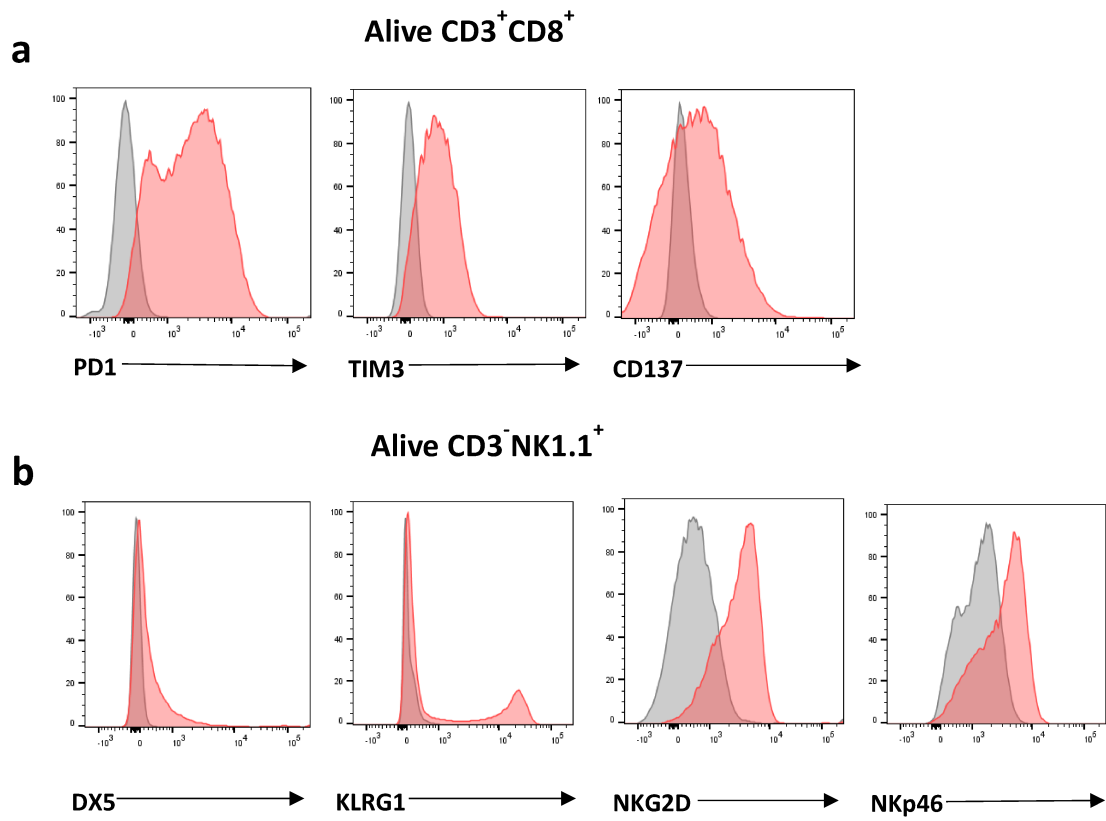

**Supplementary Figure 5. Surface antigen characterization by flow cytometry of NKs and CTLs used for killing assays gated as living CD3<sup>+</sup>CD8<sup>+</sup> and CD3<sup>-</sup>NK1.1<sup>+</sup> cells.**

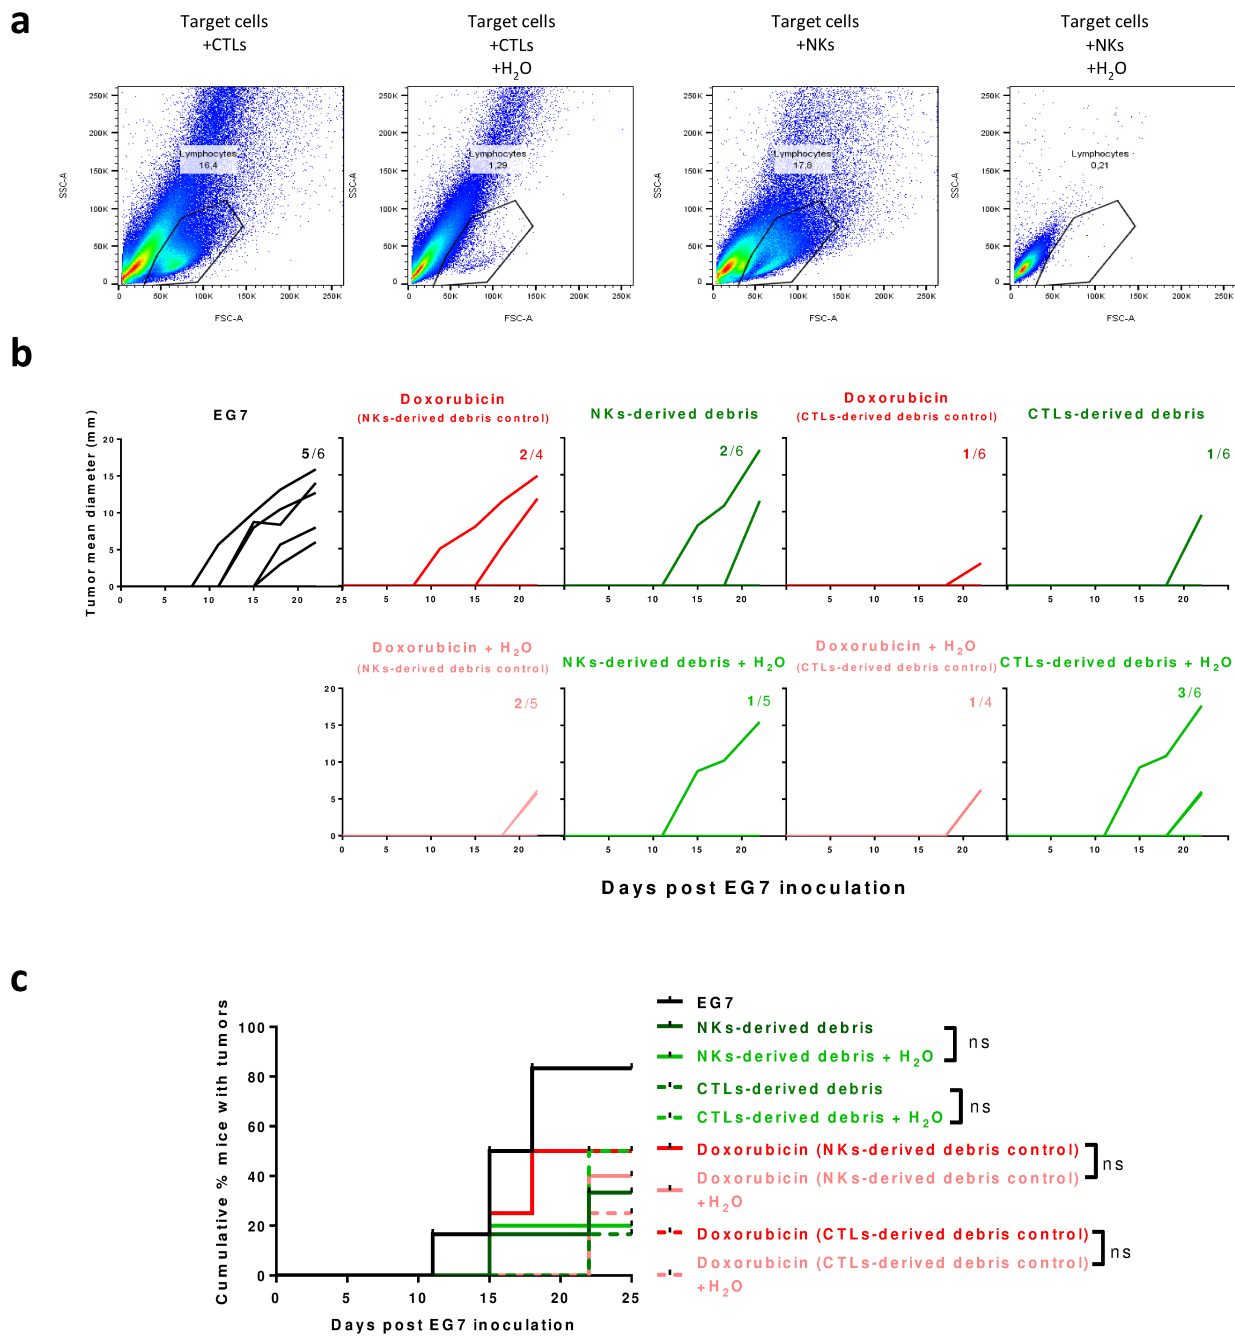

**Supplementary Figure 6. Distilled-water elimination of effector cytotoxic cells does not impair immunization.** In experiment as those in Fig. 2 and 4 effector cytotoxic T or NK cells (A) were removed by 60 min incubation in distilled water. Such lysates of MC38hEGFROVA deprived of cytotoxic effectors were tested to immunize against

OVA<sup>+</sup> EG7 cells when given 7 days later (B and C). Doxorubicin-killed lysates with or without preincubation with gp100 peptide and IFN $\gamma$  have been used as positive control for CTLs-derived debris or NKs-derived debris, respectively. Log-rank tests were used for the indicated comparisons.
